# Supplementary material
Source: MDPI journal article supplement (https://www.mdpi.com/2297-8739/10/8/436)
Supplement: s1 [file s1]

Table S1. The effects of the solvent, particle size and extraction time on the extraction yield

|                 | SS       | Degree of freedom | MS       | F      | <i>p</i>    |
|-----------------|----------|-------------------|----------|--------|-------------|
| Intercept       | 742820.9 | 1                 | 742820.9 | 3344.1 | 0.000000*** |
| Solvent         | 357077.7 | 12                | 29756.5  | 134.0  | 0.000000*   |
| Particle size   | 17592.7  | 1                 | 17592.7  | 79.2   | 0.000000*   |
| Extraction time | 14523.6  | 3                 | 4841.2   | 21.8   | 0.000000*   |
| Error           | 16659.8  | 75                | 222.1    |        |             |

\* significant at  $p < 0.001$  level

Table S2. The effects of the solvent, particle size and extraction time on the total phenolic content

|                 | SS      | Degree of Freedom | MS      | F      | <i>p</i>  |
|-----------------|---------|-------------------|---------|--------|-----------|
| Intercept       | 24523.6 | 1                 | 24523.6 | 1918.2 | 0.000000* |
| Solvent         | 2223.8  | 12                | 185.3   | 14.5   | 0.000000* |
| Particle size   | 489.6   | 1                 | 489.6   | 38.3   | 0.000000* |
| Extraction time | 725.4   | 3                 | 241.8   | 18.9   | 0.000000* |
| Error           | 958.8   | 75                | 12.8    |        |           |

\* significant at  $p < 0.001$  level

Table S3. The effects of the solvent, particle size and extraction time on the total flavonoid content

|                 | SS    | Degree of Freedom | MS    | F     | <i>p</i>   |
|-----------------|-------|-------------------|-------|-------|------------|
| Intercept       | 723.4 | 1                 | 723.4 | 197.2 | 0.000000** |
| Solvent         | 927.0 | 12                | 77.2  | 21.1  | 0.000000** |
| Particle size   | 14.6  | 1                 | 14.6  | 4.0   | 0.049388*  |
| Extraction time | 95.5  | 3                 | 31.8  | 8.7   | 0.000052** |
| Error           | 275.2 | 75                | 3.7   |       |            |

\* significant at  $p < 0.5$  level; \*\* significant at  $p < 0.001$  level

Table S4. The effects of the solvent, particle size and extraction time on the DPPH

|                 | SS       | Degree of Freedom | MS       | F      | <i>p</i>   |
|-----------------|----------|-------------------|----------|--------|------------|
| Intercept       | 245953.8 | 1                 | 245953.8 | 1054.7 | 0.000000** |
| Solvent         | 128876.7 | 12                | 10739.7  | 46.1   | 0.000000** |
| Particle size   | 528.5    | 1                 | 528.5    | 2.3    | 0.136413*  |
| Extraction time | 16179.0  | 3                 | 5393.0   | 23.1   | 0.000000** |
| Error           | 17489.7  | 75                | 233.2    |        |            |

\* significant at  $p < 0.5$  level; \*\* significant at  $p < 0.001$  level

Table S5. The effects of the solvent, particle size and extraction time on the IC<sub>50</sub>

|               | SS       | Degree of Freedom | MS       | F      | <i>p</i>  |
|---------------|----------|-------------------|----------|--------|-----------|
| Intercept     | 106264.3 | 1                 | 106264.3 | 1507.1 | 0.000000* |
| Solvent       | 55960.8  | 12                | 4663.4   | 66.1   | 0.000000* |
| Particle size | 2622.6   | 1                 | 2622.6   | 37.2   | 0.000000* |

|                 |        |    |        |      |           |
|-----------------|--------|----|--------|------|-----------|
| Extraction time | 6841.3 | 3  | 2280.4 | 32.3 | 0.000000* |
| Error           | 5288.0 | 75 | 70.5   |      |           |

\* significant at  $p < 0.001$  level
